# Supplementary material
Source: PubMed Central journal article supplement (PMC3970428)
Supplement: NIHMS560634-supplement-i.pdf [file NIHMS560634-supplement-i.pdf]

**Table 1**

|                            | <b>Green Hard</b> | <b>Green Soft</b> | <b>Pink Soft</b> | <b>Ripe</b>   |
|----------------------------|-------------------|-------------------|------------------|---------------|
| <b>pH</b>                  | 3.0±0.03          | 3.2±0.04          | 3.33±0.03        | 3.60±0.04     |
| <b>TSS</b>                 | 6.0±0.20          | 8.0 ±0.2          | 12±0.37          | 17 ±0.3       |
| <b>Total acidity</b>       | 22.6±0.5          | 11.6±0.34         | 6.6±0.26         | 4.8±0.14      |
| <b>Berry weight</b>        | 1.3±0.14          | 3.0±0.09          | 3.2 ±0.12        | 3.5±0.18      |
| <b>Anthocyanin content</b> | 0.0169± 0.099     | 0.0418±0.0031     | 0.273±.0324      | 1.432 ±0.0753 |
| <b>Force Mean kg-1</b>     | 5.854±0.39        | 1.876±0.16        | 0.694±0.06       | 0.32±0.032    |

Total soluble solids content (SSC, °Brix), total acidity (g tartaric·L<sup>-1</sup>), pH, anthocyanin (mg/gm of berries) and texture measurement throughout ripening in Muscadine cv. Noble during 2011 season.

**Table 2.** Protein yield in Muscadine berries. Protein estimated by Bradford method and expressed mg/g of berries

| Biological Replicate | Phenol Method |            |           |      | TCA method |            |           |       |
|----------------------|---------------|------------|-----------|------|------------|------------|-----------|-------|
|                      | Green Hard    | Green Soft | Pink Soft | Ripe | Green Hard | Green Soft | Pink Soft | Ripe  |
| 1                    | 0.68          | 0.73       | 0.78      | 0.77 | 0.114      | 0.193      | 0.232     | 0.293 |
| 2                    | 0.54          | 0.79       | 0.64      | 0.83 | 0.13       | 0.158      | 0.289     | 0.233 |
| 3                    | 0.57          | 0.68       | 0.69      | 0.79 | 0.125      | 0.172      | 0.294     | 0.255 |
| 4                    | 0.63          | 0.74       | 0.71      | 0.82 | 0.127      | 0.183      | 0.224     | 0.272 |

## Summary of Proteins Detected using the Paragon Algorithm

Table 3: iTRAQ 8 plex Replication 1

| <b>Unused (Conf) Cutoff</b> | <b>Proteins Detected</b> | <b>Proteins Before Grouping</b> | <b>Distinct Peptides</b> | <b>Spectra Identified</b> | <b>% Total Spectra</b> |
|-----------------------------|--------------------------|---------------------------------|--------------------------|---------------------------|------------------------|
| >2.0 (99)                   | 340                      | 915                             | 2599                     | 4567                      | 30                     |
| >1.3 (95)                   | 522                      | 1463                            | 3114                     | 5242                      | 34.5                   |
| >0.47 (66)                  | 570                      | 1570                            | 3245                     | 5400                      | 35.5                   |
| Cutoff Applied: >1.3 (95%)  | 522                      | 1463                            | 3114                     | 5242                      | 34.5                   |

Table 4: iTRAQ 8 plex Replication 2

| <b>Unused (Conf) Cutoff</b> | <b>Proteins Detected</b> | <b>Proteins Before Grouping</b> | <b>Distinct Peptides</b> | <b>Spectra Identified</b> | <b>% Total Spectra</b> |
|-----------------------------|--------------------------|---------------------------------|--------------------------|---------------------------|------------------------|
| >2.0 (99)                   | 266                      | 734                             | 1958                     | 3338                      | 33.5                   |
| >1.3 (95)                   | 352                      | 1084                            | 2194                     | 3618                      | 36.3                   |
| >0.47 (66)                  | 387                      | 1210                            | 2303                     | 3747                      | 37.6                   |
| Cutoff Applied: >1.3 (95%)  | 352                      | 1084                            | 2194                     | 3618                      | 36.3                   |

| <b>Supplementary Table 9 -List of primers used for real-time qRT-PCR.</b>                                                                                                                            |                                                             |                   |                            |
|------------------------------------------------------------------------------------------------------------------------------------------------------------------------------------------------------|-------------------------------------------------------------|-------------------|----------------------------|
| <b>Primers were generated for quantitative real-time RT-PCR for comparison with iTRAQ quantitative data. Name of Uniprot Identifier, Name of proteins, Gene name and Primer sequences are shown.</b> |                                                             |                   |                            |
| <b>Uniprot ID</b>                                                                                                                                                                                    | <b>Name</b>                                                 | <b>Gene Name</b>  | <b>Sequence 5'-3'</b>      |
| A5C6H7                                                                                                                                                                                               | Sucrose synthase Forward Primer                             | VITISV_035889     | GGGAGAAGTCCGAGCATCAG       |
|                                                                                                                                                                                                      | Sucrose Synthase Reverse Primer                             |                   | GATGCGGTTGCAAAATCCCA       |
| F6HG44                                                                                                                                                                                               | Glyceraldehyde 3 phosphate dehydrogenase Forward Primer     | VIT_01s0010g02460 | GCTATCATGGGCTCTGACAAGA     |
|                                                                                                                                                                                                      | Glyceraldehyde 3 phosphate dehydrogenase Reverse Primer     |                   | TTACAGCCACCAGTTCCACA       |
| F6GX19                                                                                                                                                                                               | Isopentenyl Diphosphate Isomerase Forward Primer            | VIT_04s0023g00600 | CGCTCGCCCTCAAATTTCTC       |
|                                                                                                                                                                                                      | Isopentenyl Diphosphate Isomerase Reverse Primer            |                   | GACAGAGATGCCCTCCGAAA       |
| Q9FS43                                                                                                                                                                                               | PR10 Forward Primer                                         | VITISV_017150     | CCACCCTAGTTCTCACATCT       |
|                                                                                                                                                                                                      | PR10 Reverse Primer                                         |                   | CTCCTGCTCGTAAGTGAAAA       |
| G9JVT0                                                                                                                                                                                               | PR-4 Forward Primer                                         | AF061329.1        | ACCCATGACTTGGCTGTTTCT      |
|                                                                                                                                                                                                      | PR-4 Reverse Primer                                         |                   | ATGCTACCAGCGGTCAAGAT       |
| A5AQ89                                                                                                                                                                                               | Profilin Forward Primer                                     | VITISV_041272     | GCCACCAGGTTGGAGAAAGA       |
|                                                                                                                                                                                                      | Profilin Reverse Primer                                     |                   | GGATGGAGGATGAGGAAGCG       |
| F6HI56                                                                                                                                                                                               | Vicilin-like antimicrobial peptides 2-1-like Forward Primer | VIT_07s0151g00640 | CACAGGTGAACAAAGGCGTG       |
|                                                                                                                                                                                                      | Vicilin-like antimicrobial peptides 2-1-like Reverse Primer |                   | GCGACTACGATTAGGGGGTG       |
| G4XMZ9                                                                                                                                                                                               | Polygalacturonase-inhibiting protein Forward Primer         | PGIP3             | GACAATCCCTACATTCTAGCTTCGTG |
|                                                                                                                                                                                                      | Polygalacturonase-inhibiting protein Reverse Primer         |                   | GGAACGGAAGGTCACCAACAGC     |

|        |                                                   |                   |                           |
|--------|---------------------------------------------------|-------------------|---------------------------|
| Q9M4G9 | Major latex protein 28 Forward Primer             | XM_002284480.2    | TCTTGTCGGGAGTTGCTTT       |
|        | Major Latex Protein 28 Reverse Primer             |                   | TGATGGAGCCCATGGAAGTT      |
| E0CSB6 | Mitochondrial Malate Dehydrogenase Forward Primer | VIT_19s0014g01640 | ACCATATCTCAGGTTGCTGG      |
|        | Mitochondrial Malate Dehydrogenase Reverse Primer |                   | TGCCGGCATTGATGTTAAAG      |
| F6I0F6 | Alcohol dehydrogenase 1 Forward Primer            | VIT_04s0044g01120 | AGCAGGAAAGCCATTGGTGA      |
|        | Alcohol dehydrogenase Reverse Primer              |                   | AGTATGGCAGAGGGAGGTGA      |
| F6H0C4 | Dehydrin Forward Primer                           | VIT_18s0001g00360 | GGAGGTGATTGTTACCGACT      |
|        | Dehydrin Reverse Primer                           |                   | TCTCCAAGAGTCCATGCTTC      |
| E0CR99 | Flavonol synthase Forward Primer                  | VIT_18s0001g03430 | CTTGAGCCACCGTCTGATC       |
|        | Flavonol synthase Reverse Primer                  |                   | TTCTTGGTCTTGTACCTAGCAGGAT |
| F6HID6 | Fatty acid hydroperoxide lyase Forward Primer     | VIT_12s0059g01060 | GACGCCCTCGTCTCTAACTC      |
|        | Fatty acid hydroperoxide lyase Reverse Primer     |                   | GGCCCTGGAACCAGAAGTAG      |
| F6H0Z2 | Cationic Peroxidase Forward Primer                | VIT_18s0001g06890 | GGTGGCTCTCTCAGGAACTC      |
|        | Cationic peroxidase 1 Reverse Primer              |                   | ATTCTCATCCCCGCCTGTC       |
| A9UFX7 | Cytosolic Ascorbate Peroxidase Forward Primer     | APX               | TCTACTCTGCGTTCGCTTC       |
|        | Cytosolic Ascorbate Peroxidase Reverse Primer     |                   | TCTGGTACTCCTCGCTCACA      |
| D7T1F3 | Calmodulin Forward Primer                         | VIT_06s0009g01910 | TGATGGCAAAGAGAAGAGGGA     |
|        | Calmodulin Reverse Primer                         |                   | TTCCGGCGACCATTTCTTTTC     |
| A5AEH1 | 14-3-3 Forward Primer                             | VITISV_032972     | TCTCTCCTCCTTCGCATTTTC     |
|        | 14-3-3 Reverse Primer                             |                   | TGAATTGAACCATCTCCTCGT     |
| Q9LLL9 | Aquaporin pip1 Forward Primer                     | PIP1b             | GGTGGGACCGTTCATTGGAG      |
|        | Aquaporin pip1 Reverse Primer                     |                   | AAAAGGCCAATCTCAAGCCCT     |

|        |                                                                    |                   |                         |
|--------|--------------------------------------------------------------------|-------------------|-------------------------|
| Q3ZPN4 | Anthraniloyl-CoA: methanol anthraniloyl transferase Forward primer | AY705388.1        | CCGGGTTTGGAGAGGTAAAC    |
|        | Anthraniloyl-CoA: methanol anthraniloyl transferase Reverse primer |                   | CCTGAACCTCGTACAGAAGC    |
| Q56AY1 | Glutathione S-transferase Forward Primer                           | VIT_04s0079g00690 | ACAAAGTTACCACCCAGCAA    |
|        | Glutathione S-transferase Reverse Primer                           |                   | TCTTGGACAGCCTCTCTCA     |
| F6I0F5 | Actin Forward Primer                                               | VIT_04s0044g01150 | GGTCAACCATGTTCCCTGGTATT |
|        | Actin Reverse Primer                                               |                   | GGAGCAAGAGCAGTGATTCCTT  |
